# Supplementary material for: Tectono-thermal evolution of Oman's Mesozoic passivecontinental margin under the obducting Semail Ophiolite: acase study Jebel Akhdar, Oman
Source: Copernicus journal article supplement (doi:10.5194/se-2018-78), 2018-08-14
Supplement: Supplementary file 1 [file se-2018-78-supplement.pdf]

## ELECTRONIC SUPPLEMENTARY MATERIAL

| layer                             | depositional age [Ma] | lithology                           | mean thickness [m] | petroleum system element |
|-----------------------------------|-----------------------|-------------------------------------|--------------------|--------------------------|
| Ophiolite                         | 79-79.8               | mixed ophiolite                     | ?                  |                          |
| Ophiolite 8                       | 79.8-80.7             | mixed ophiolite                     | ?                  |                          |
| Ophiolite 7                       | 80.7-81.6             | mixed ophiolite                     | ?                  |                          |
| Ophiolite 6                       | 81.6-82.5             | mixed ophiolite                     | ?                  |                          |
| Ophiolite 5                       | 82.5-83.4             | mixed ophiolite                     | ?                  |                          |
| Ophiolite 4                       | 83.4-84.3             | mixed ophiolite                     | ?                  |                          |
| Ophiolite 3                       | 84.3-85.2             | mixed ophiolite                     | ?                  |                          |
| Ophiolite 2                       | 85.2-86.1             | mixed ophiolite                     | ?                  |                          |
| Ophiolite 1                       | 86.1-87               | mixed ophiolite                     | ?                  |                          |
| Hawasina Nappes                   | 87-87.5               | Limestone (shaly)                   | 1.400              |                          |
| Aruma Gp                          | 87.5-88.6             | Conglomerate, Shale, Limestone      | 600                | Seal Rock                |
| Erosion: Wasia-Aruma break        | 88.6-91               | Limestone (micrite)                 |                    |                          |
| Wasia Gp. - Natih A               | 91-95                 | Limestone (micrite)                 | 50                 | Reservoir Rock           |
| Wasia Gp. - Natih B               | 95-96                 | Limestone (organic rich - 10% TOC)  | 50                 | Source Rock, 15% TOC     |
| Wasia Gp. - Natih C, D            | 96-98                 | Limestone (micrite)                 | 65                 | Reservoir Rock           |
| Wasia Gp. - Natih E               | 98-100                | Limestone (organic rich - 10% TOC)  | 60                 | Source Rock, 4% TOC      |
| Wasia Gp. - Natih F, G            | 100-104               | Limestone (micrite)                 | 65                 | Seal Rock                |
| Wasia Gp. - Nahr Umr              | 104-113               | Limestone (shaly)                   | 140                |                          |
| Kahmah Gp. - Shuaiba Fm.          | 113-124               | Limestone (organic rich - 1-2% TOC) | 350                |                          |
| Kahmah Gp. - Kharairb, Lekhair Fm | 124-130               | Limestone (shaly)                   | 150                |                          |
| Kahmah Gp. - Habshan Fm-          | 130-136               | Limestone (micrite)                 | 75                 |                          |
| Kahmah Gp. - Salil Fm.            | 136-139               | Limestone (micrite)                 | 75                 |                          |
| Kahmah Gp. - Rayda Fm.            | 139-147               | Limestone (micrite)                 | 75                 |                          |
| Sahtan Gp.                        | 147-187               | Sandstone (arkose, quartz poor)     | 370                |                          |
| Hiatus Sahtan - Akhdar            | 187-200               | Dolomite (typical)                  |                    |                          |
| Akhdar Gp. - Mahil Fm.            | 200-267               | Dolomite (typical)                  | 600                |                          |

**Figure S1: Stratigraphic age assignment used for the numerical basin modeling**

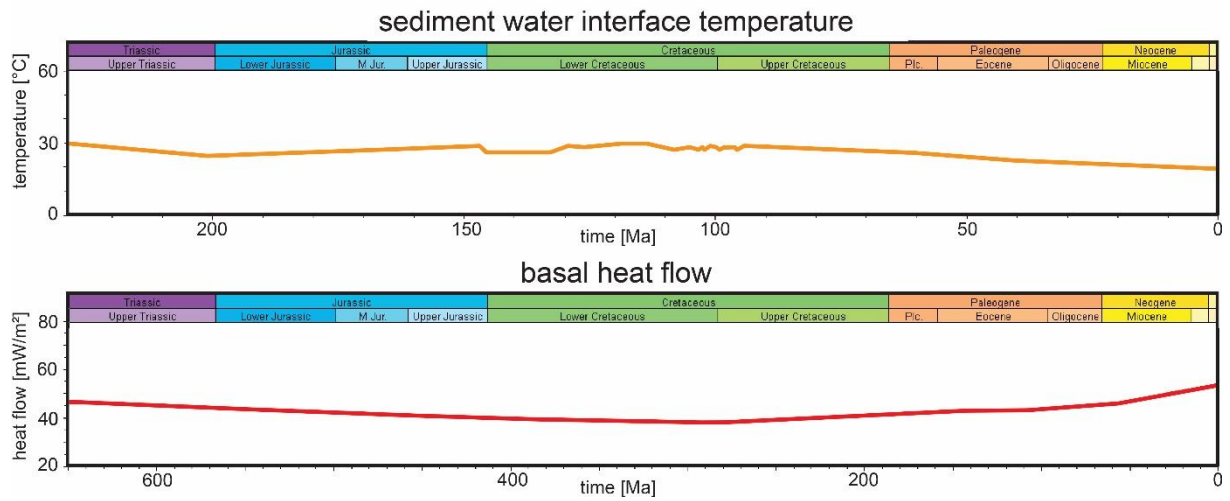

**Figure S2: Thermal boundary conditions used for numerical basin modeling. Mean surface temperatures are reconstructed based on plate motion and the changing paleo-latitude (Wygrala, 1989). Basal heat flow was constrained by sensitivity analysis.**

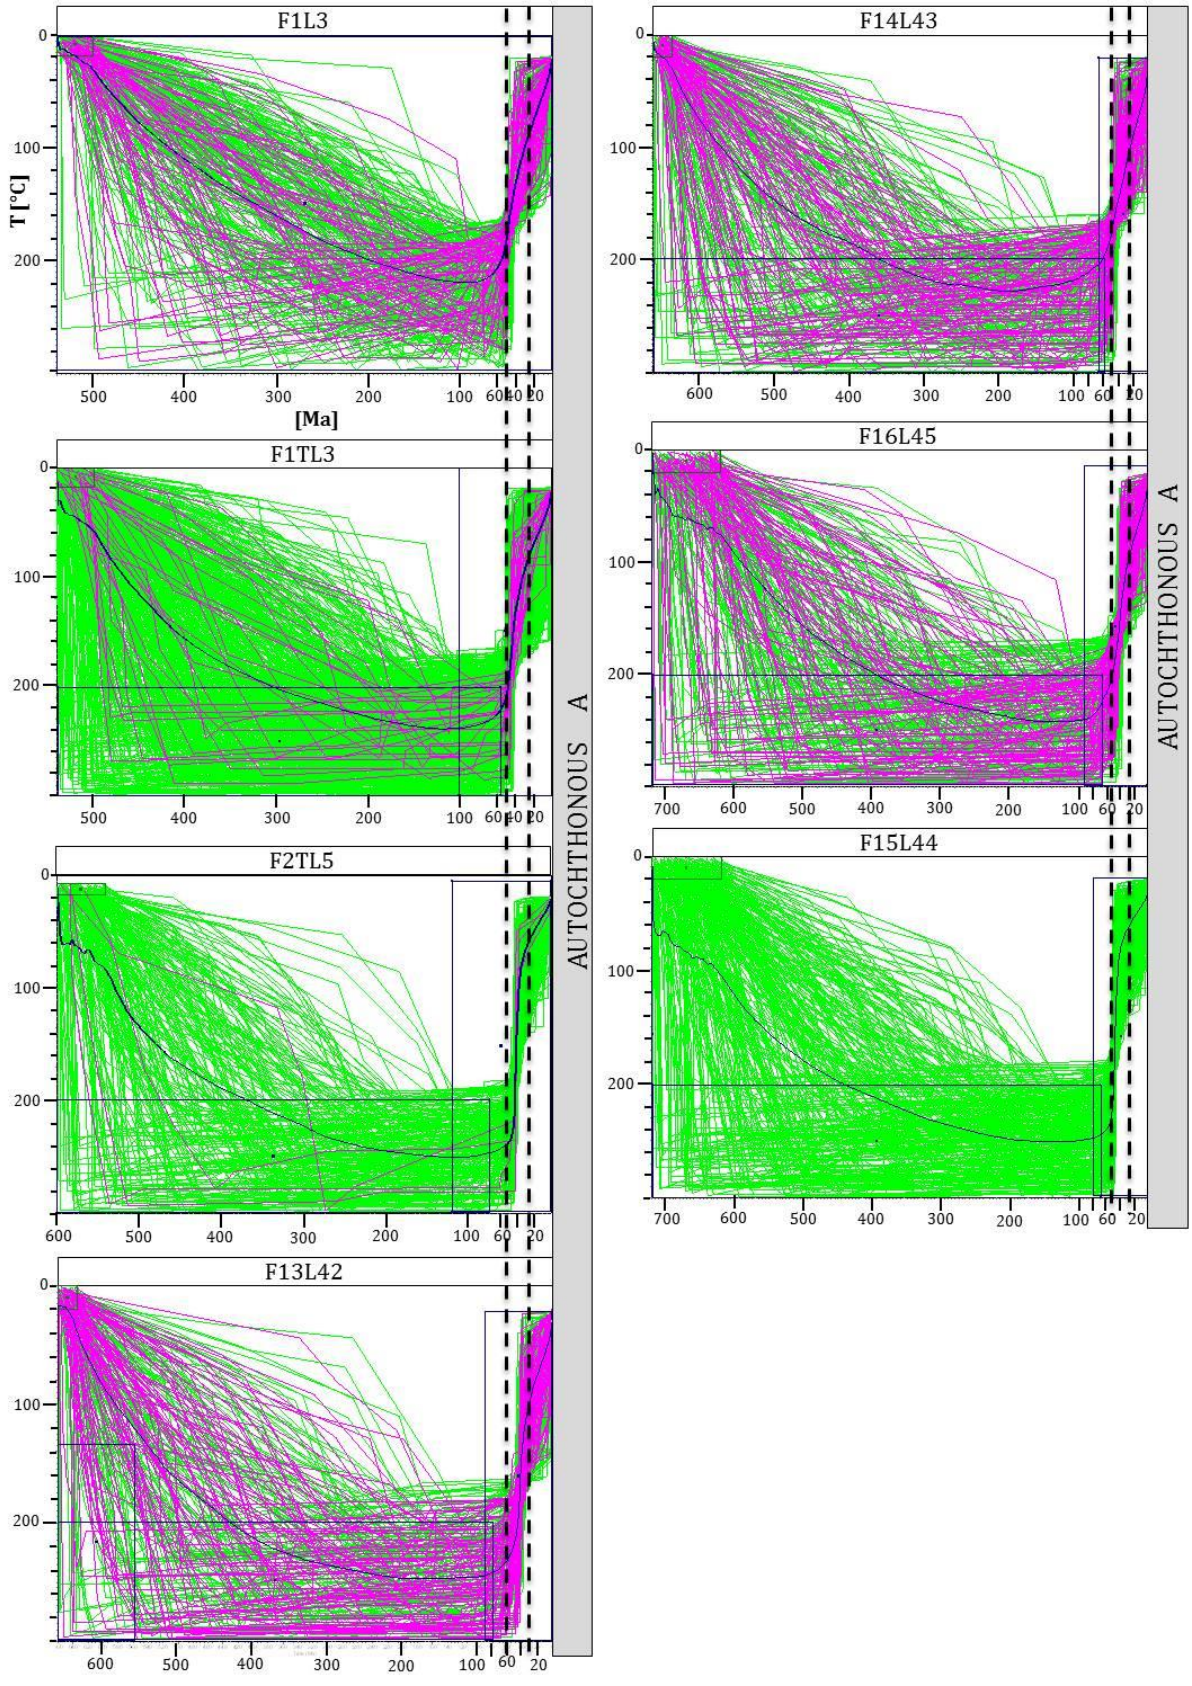

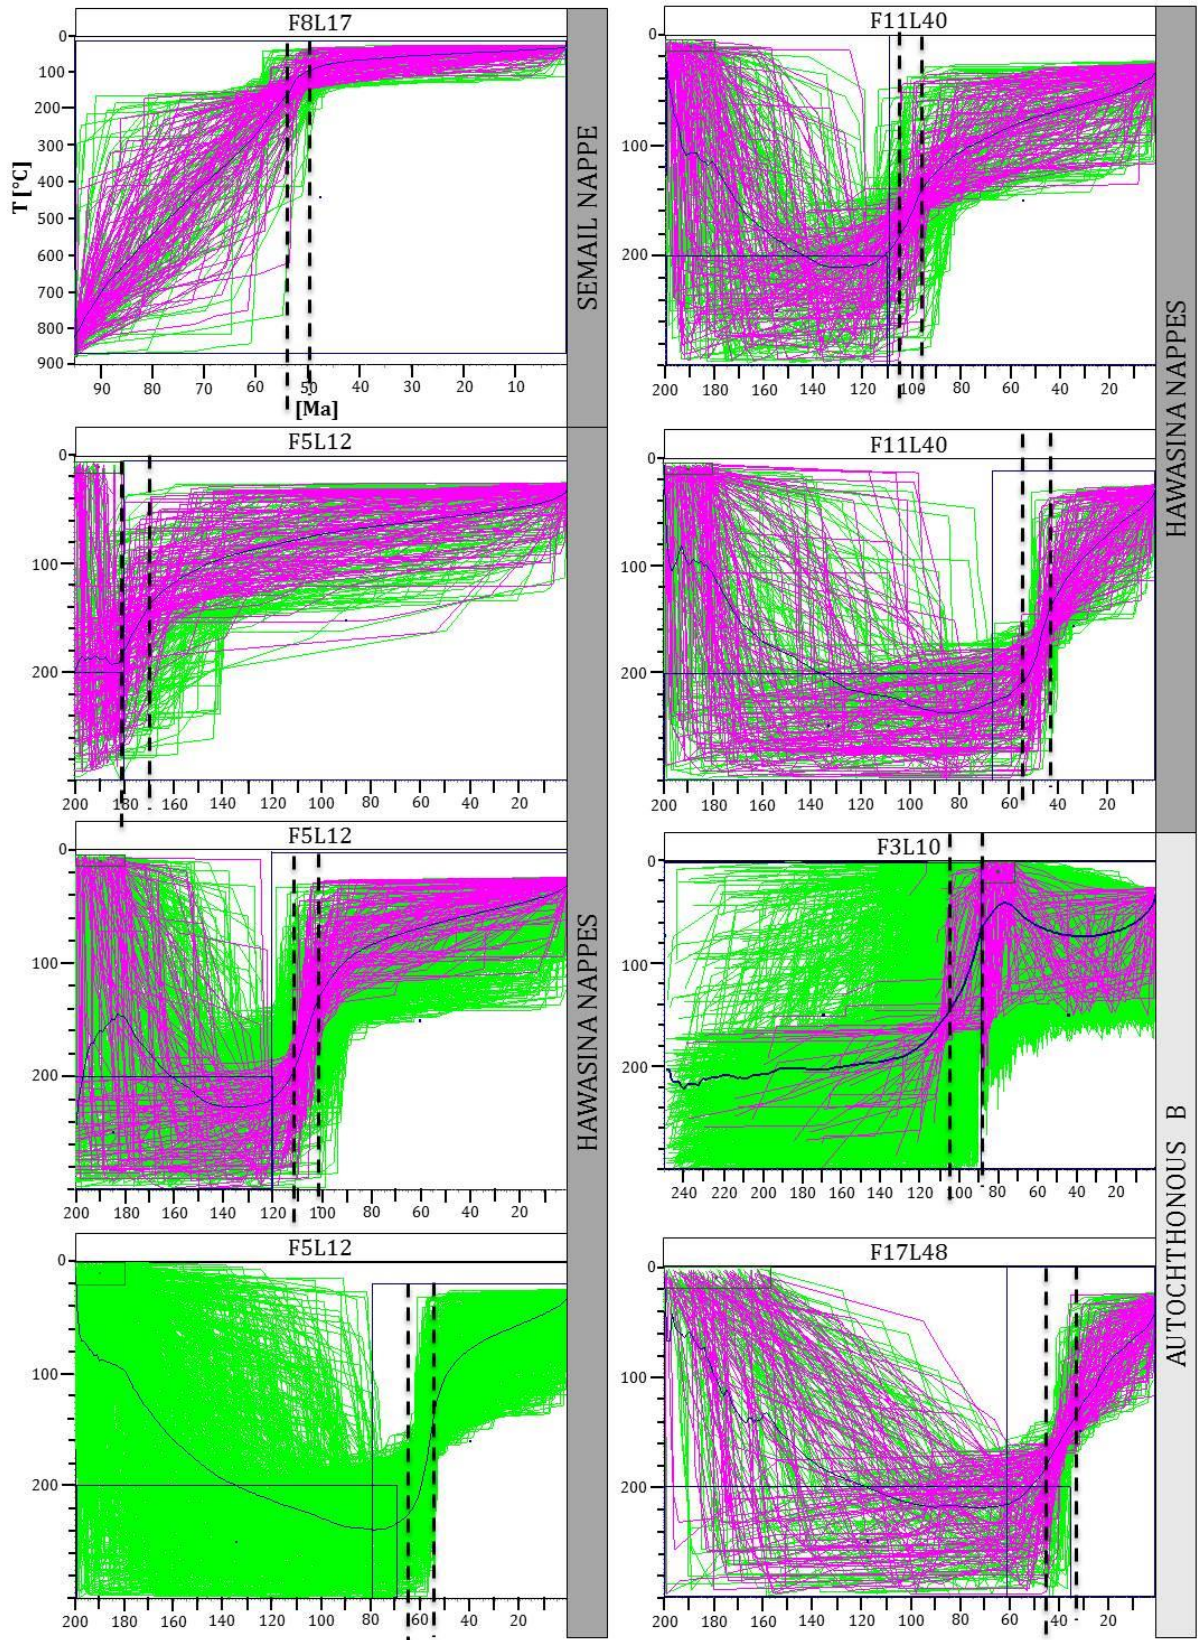

Figure S3 (previous page) and S4: Modeled time-temperature paths of samples of Semail Ophiolite, Hawasina Nappes, Autochthonous A and B. The black line represents the weighted mean values of good fits between model and data (purple paths) and acceptable fits (green paths). Models outline rapid cooling until c. 50 Ma in the Ophiolite (A), and main cooling in Hawasina Nappes (C), and Autochthonous A and B (D, E) at c. 50-30 Ma. Modeled paths of the not reset zircons of the Hawasina Nappes are shown in comparison (B).

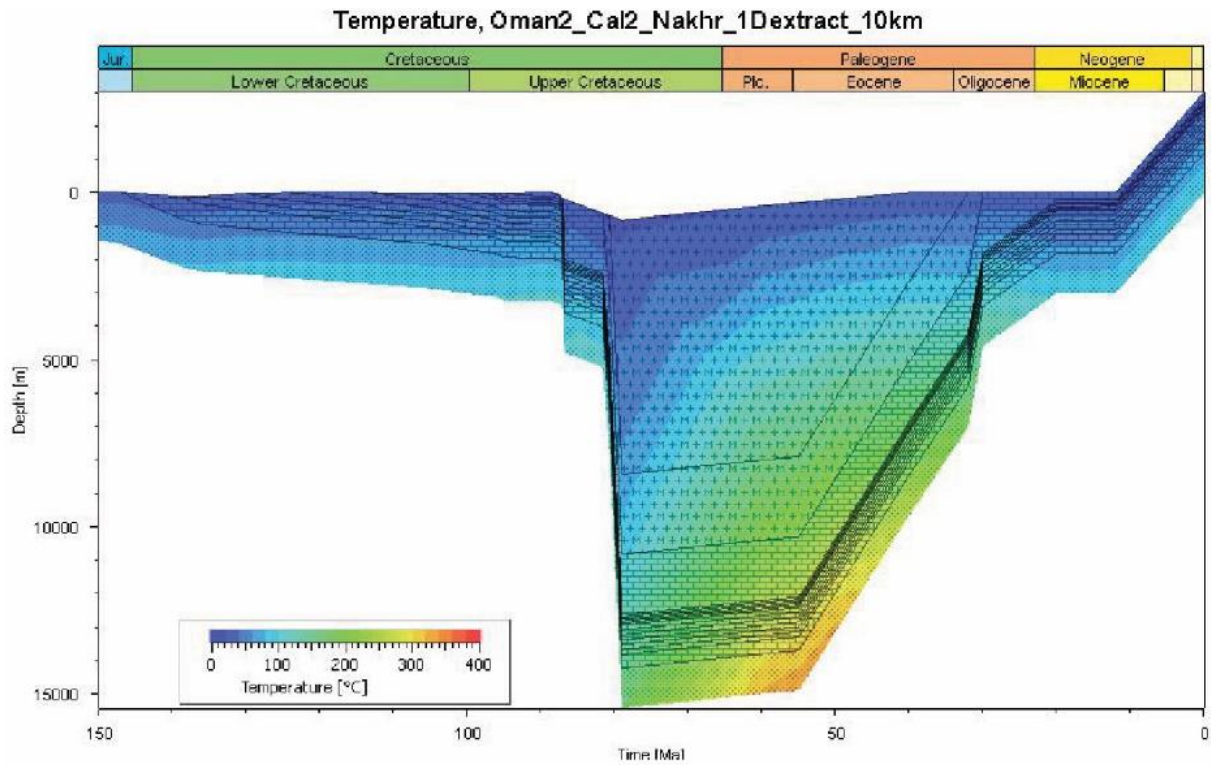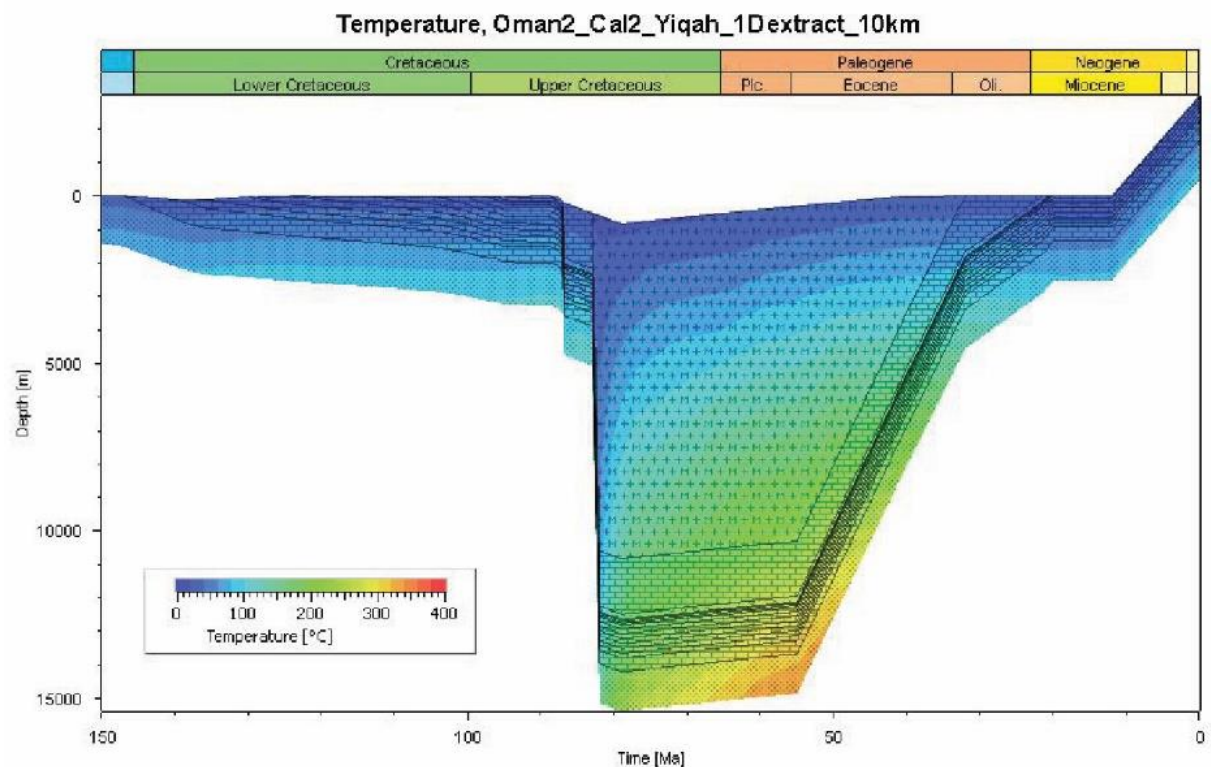

**Figure S5: Modeling results: Two representative burial plots for two pseudo-wells created near the entrances of Wadi Nakhr and Yiqah (Figure 1) show two phases of rapid burial related to Hawasina Nappe and ophiolite emplacement at 88 and 78 Ma. Burial in the North (Wadi Yiqah) starts c. 2 Ma earlier due to ophiolite obduction taking place from N to S.**

## Pressure Build-up in Natih B under perfect top seal (Wadi Nakhr)

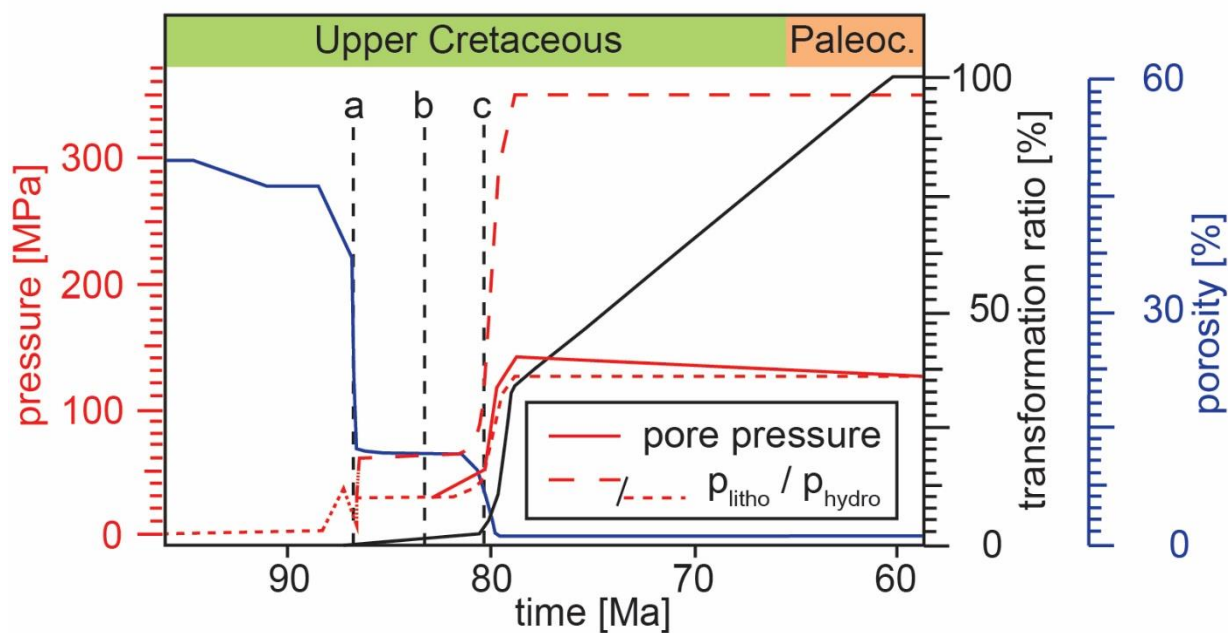

**Figure S6:** Pressure and porosity model results for the Natih B source rock at Wadi Nakhr with perfect seal conditions ( $k_v, h = 10\text{-}23 \text{ m}^2$ ) assigned to the Muti Fm. (top seal): Porosity loss (blue) over time in response to the moving forebulge (a), the emplacement of sedimentary (b) and ophiolitic nappes (c). Comparison to the transformation ratio (black) outlines overpressure associated with hydrocarbon generation.

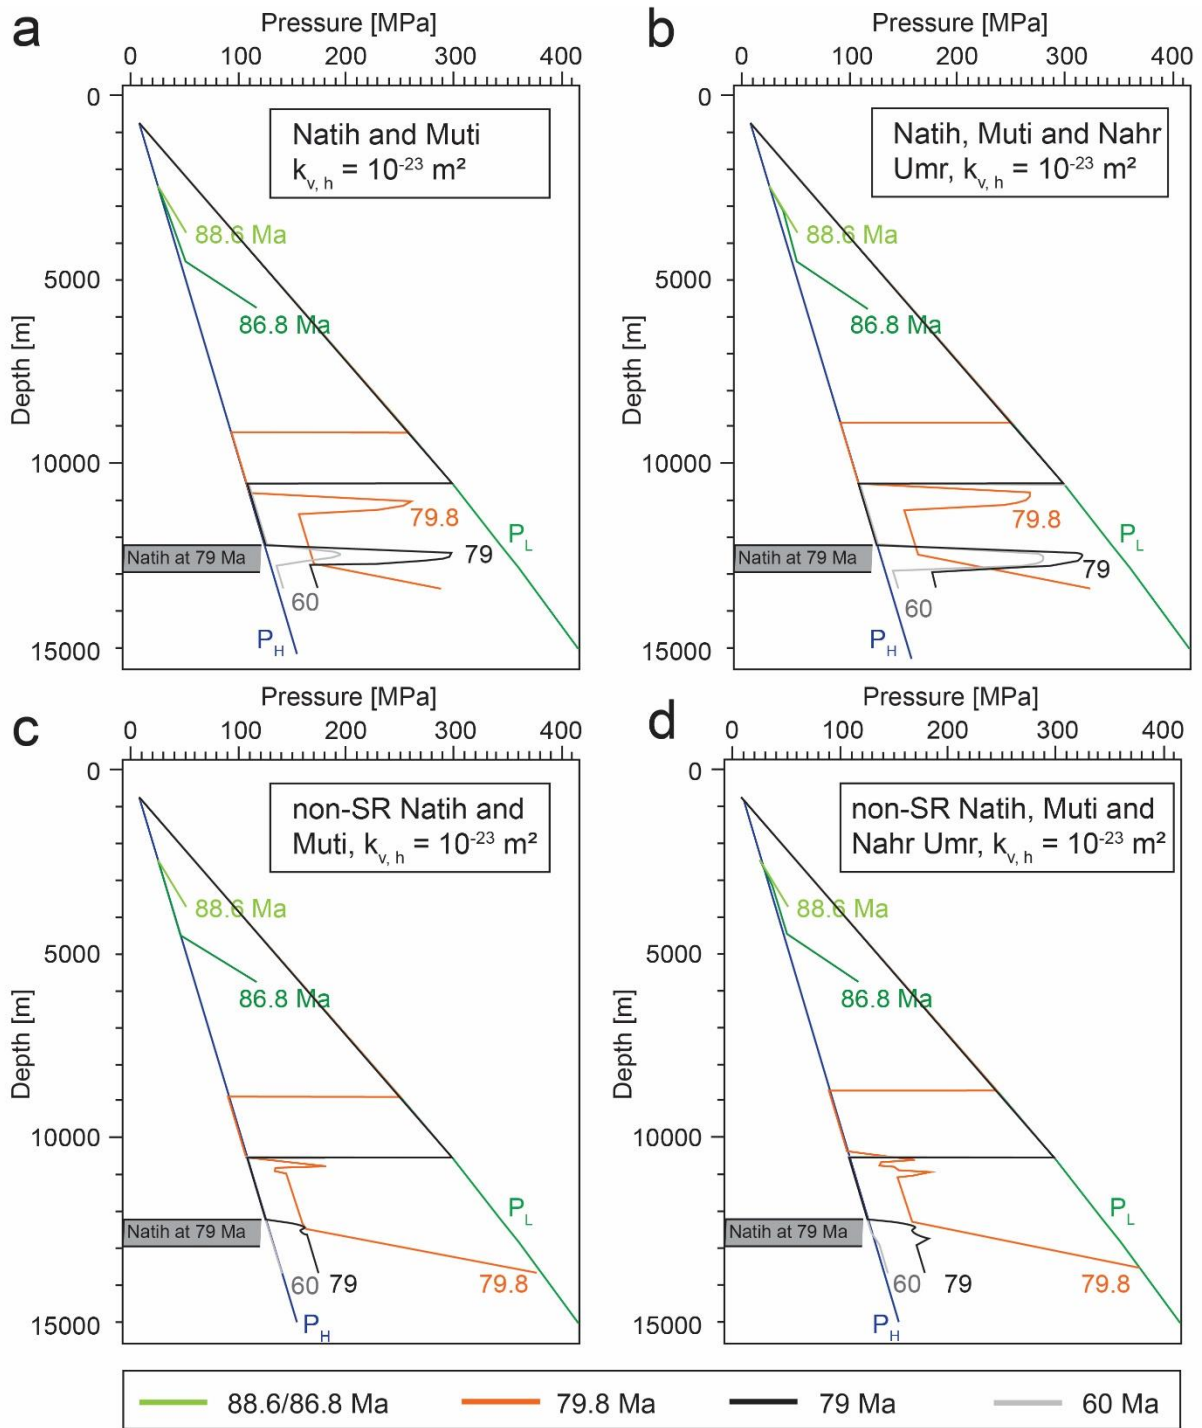

**Figure S7:** Pressure depth evolution for selected time steps (numbers in Ma) and reduced permeabilities of Muti, Natih and/or Nahr Umr Fm. Lithostatic and hydrostatic pressure lines and the position of the Natih Fm. are shown for peak pressures when deepest burial was reached at 79 Ma. Normal permeabilities of a shaly limestone with a porosity of 1 % reached by burial under the ophiolite are in the order of 10-15 m<sup>2</sup>.

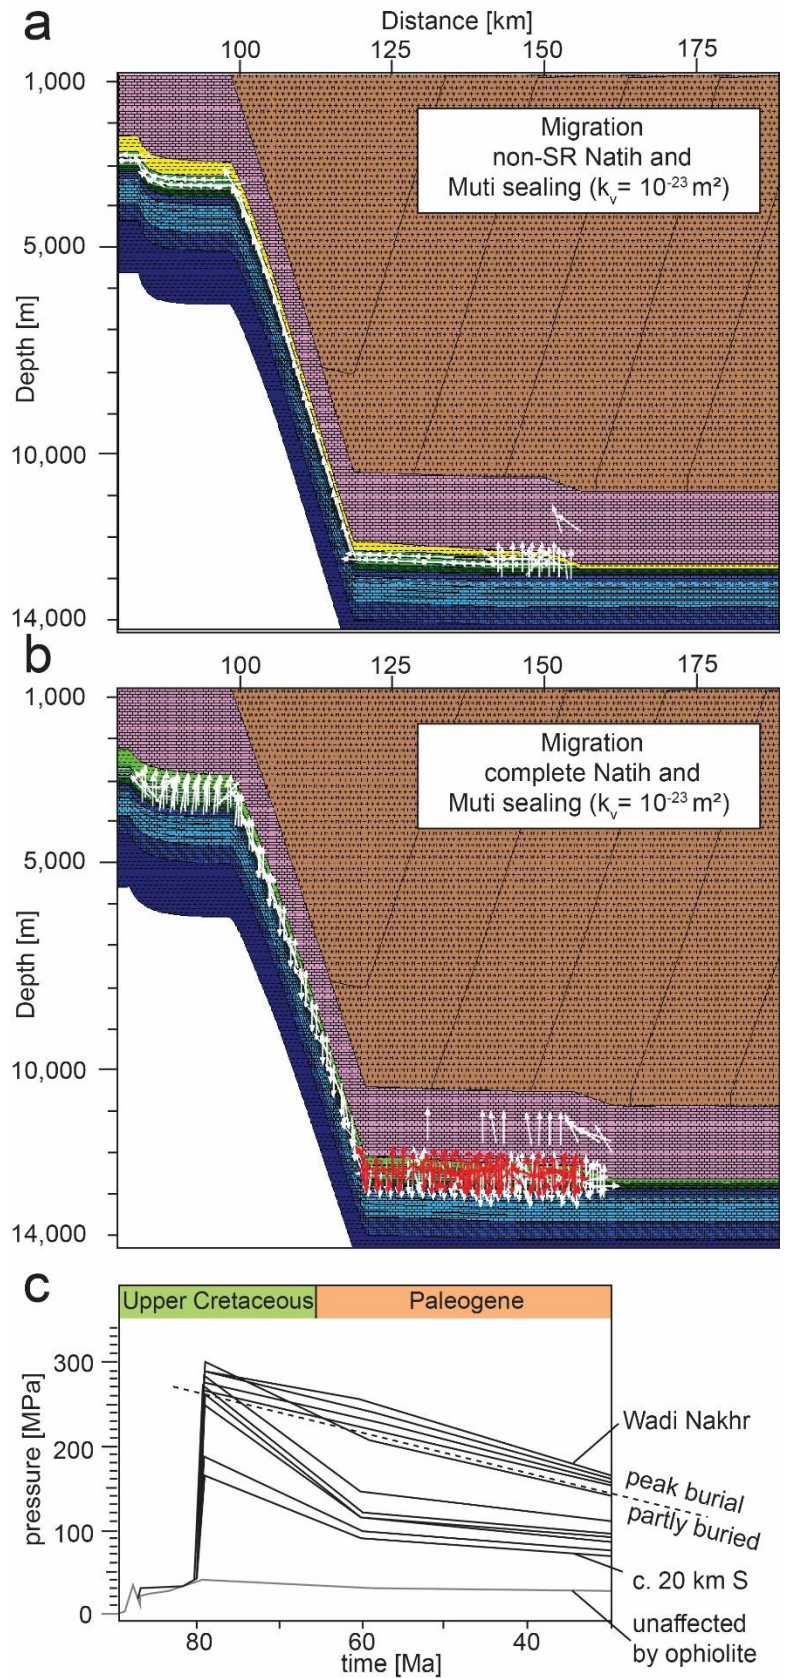

Figure S8: Model results of fluid migration in front of the obducting ophiolite. Migration localizes in the source rock layers of the Natih Fm. if they remain permeable (a) or at layer boundaries if the complete Natih has reduced permeabilites (b). Pressure evolution of the Natih Fm. over time for selected locations underneath the ophiolite (c) show how a pressure gradient established during obduction. The topmost black line represents the location of the Wadi Nakhr, each line below a position 2 km further south. The gray baseline represents the obduction-uneffected pressure evolution for comparison.



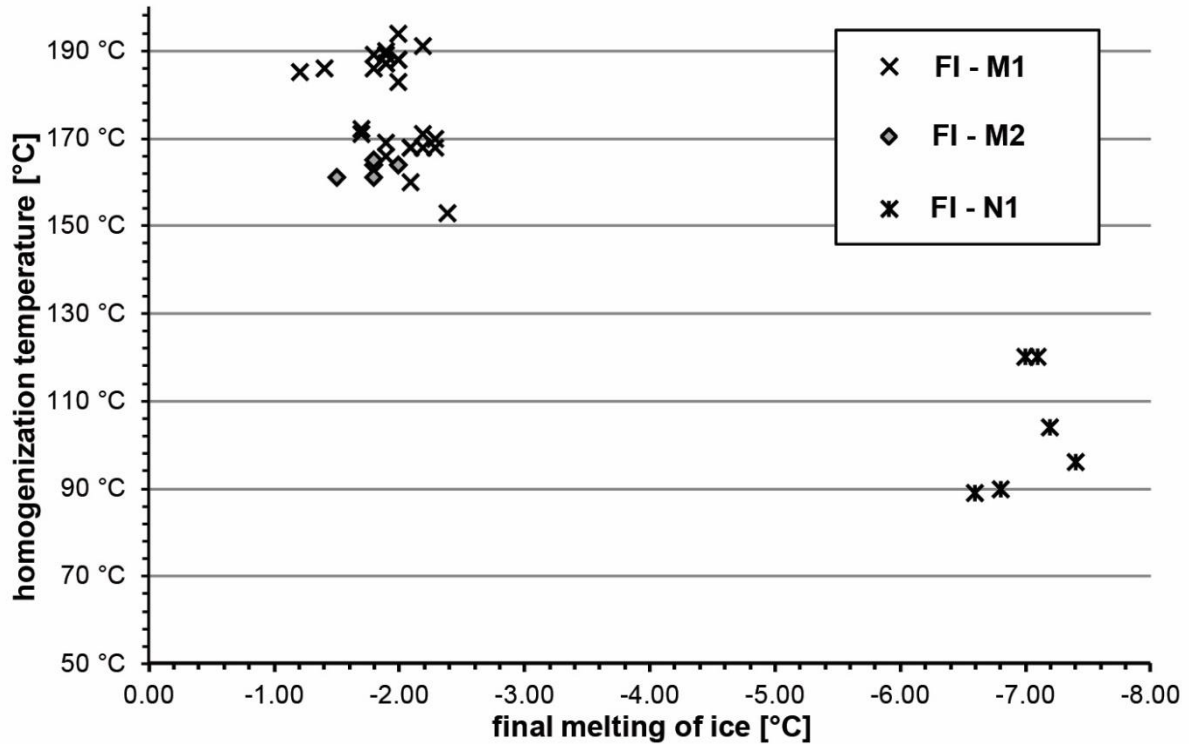

Figure S9: Additional fluid inclusion data plots: homogenization temperatures plotted against the salinities in wt.-% NaCl equivalent which are calculated out of the final melting temperature after Bodnar (1993).

| lithology                                             | density<br>[kg/m <sup>3</sup> ] | max.<br>compressibility<br>[Gpa <sup>-1</sup> ] | thermal conductivity |                      | heat capacity           |                          |
|-------------------------------------------------------|---------------------------------|-------------------------------------------------|----------------------|----------------------|-------------------------|--------------------------|
|                                                       |                                 |                                                 | at 20 °C<br>[W/m/K]  | at 100 °C<br>[W/m/K] | at 20 °C<br>[kcal/kg/K] | at 100 °C<br>[kcal/kg/K] |
| ophiolite mixed after Rioux et al. 2013*              | 3076                            | -                                               | 3,36                 | 2,96                 | 0,18                    | 0,21                     |
| serpentinized ophiolite mixed after Rioux et al. 2013 | 3012                            | -                                               | 2,28                 | 2,16                 | 0,19                    | 0,22                     |
| ophiolite mixed after Searle & Cox 2002**             | 3133                            | -                                               | 3,50                 | 3,07                 | 0,18                    | 0,20                     |
| serpentinized ophiolite mixed after Searle & Cox 2002 | 3069                            | -                                               | 2,38                 | 2,24                 | 0,19                    | 0,22                     |
| Limestone (shaly)                                     | 2730                            | 68,65                                           | 2,30                 | 2,18                 | 0,20                    | 0,23                     |
| Limestone (organic rich - 1-2% TOC)                   | 2710                            | 86,51                                           | 2,63                 | 2,42                 | 0,20                    | 0,23                     |
| Limestone (organic rich - 10% TOC)                    | 2550                            | 95,68                                           | 1,45                 | 1,55                 | 0,20                    | 0,23                     |
| Limestone (ooid grainstone)                           | 2740                            | 0,20                                            | 3,00                 | 2,69                 | 0,20                    | 0,23                     |
| Sandstone (arkose, quartz rich)                       | 2690                            | 26,71                                           | 4,05                 | 3,46                 | 0,21                    | 0,24                     |
| Conglomerate (typical)                                | 2700                            | 14,21                                           | 2,30                 | 2,18                 | 0,20                    | 0,23                     |

\* Peridotite 64.4%, Gabbro 20%, Basalt 5.7%Quarztonalite 4.6%, , Amphibolite 3%, Granodiorite 2.3%

\*\* Peridotite 64.4%, Gabbro 16.7%, Dunite 11.1%, Basalt 5.6%, Amphibolite 2.2%

**S10: Petrophysical parameters of the used lithologies in the numerical basin model.**
